# Supplementary material for: Memantine Attenuates Alzheimer’s Disease-Like Pathology and Cognitive Impairment
Source: PubMed Central journal article supplement (PMC4689401; doi:10.1371/journal.pone.0145441), 2015-12-23

S1 File.

Original Data for Figure 3

| PP2A   | 20 mu/50uL |          |          |          |          |          |          |             |
|--------|------------|----------|----------|----------|----------|----------|----------|-------------|
| I1PP2A | 0          | 5        | 10       | 20       | 40       | 80       | 160      | 320 ng/50uL |
|        | 0.221      | 0.181    | 0.129    | 0.11     | 0.085    | 0.059    | 0.052    | 0.055       |
|        | 0.218      | 0.177    | 0.142    | 0.094    | 0.081    | 0.066    | 0.065    | 0.049       |
|        | 0.231      | 0.188    | 0.136    | 0.122    | 0.088    | 0.062    | 0.048    | 0.048       |
| x      | 0.223333   | 0.182    | 0.135667 | 0.108667 | 0.084667 | 0.062333 | 0.055    | 0.050667    |
| sd     | 0.006807   | 0.005568 | 0.006506 | 0.014048 | 0.003512 | 0.003512 | 0.008888 | 0.003786    |
|        | 0          | 5        | 10       | 20       | 40       | 80       | 160      | 320         |
|        | 0.223333   | 0.182    | 0.135667 | 0.108667 | 0.084667 | 0.062333 | 0.055    | 0.050667    |

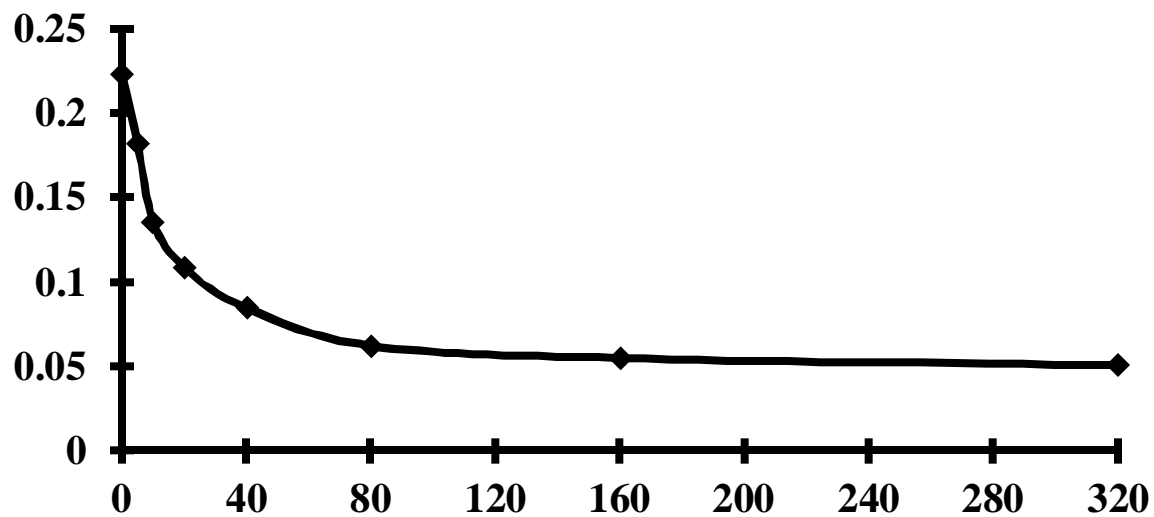

PP2A 20 mu/50uL  
I1PP2A 80

80 ng/50uL

| MMT | 0        | 2        | 5        | 10       | 50      | 100   | 200     | 500      | 1000 ng/50uL |
|-----|----------|----------|----------|----------|---------|-------|---------|----------|--------------|
|     | 0.058    | 0.078    | 0.082    | 0.111    | 0.15    | 0.223 | 0.201   | 0.21     | 0.219        |
|     | 0.06     | 0.072    | 0.075    | 0.102    | 0.152   | 0.201 | 0.22    | 0.208    | 0.205        |
|     | 0.068    | 0.068    | 0.092    | 0.099    | 0.178   | 0.197 | 0.218   | 0.223    | 0.219        |
| x   | 0.062    | 0.072667 | 0.083    | 0.104    | 0.16    | 0.207 | 0.213   | 0.213667 | 0.214333     |
| sd  | 0.005292 | 0.005033 | 0.008544 | 0.006245 | 0.01562 | 0.014 | 0.01044 | 0.008145 | 0.008083     |

|  | 0     | 2        | 5     | 10    | 50   | 100   | 200   | 500      | 1000     |
|--|-------|----------|-------|-------|------|-------|-------|----------|----------|
|  | 0.062 | 0.072667 | 0.083 | 0.104 | 0.16 | 0.207 | 0.213 | 0.213667 | 0.214333 |

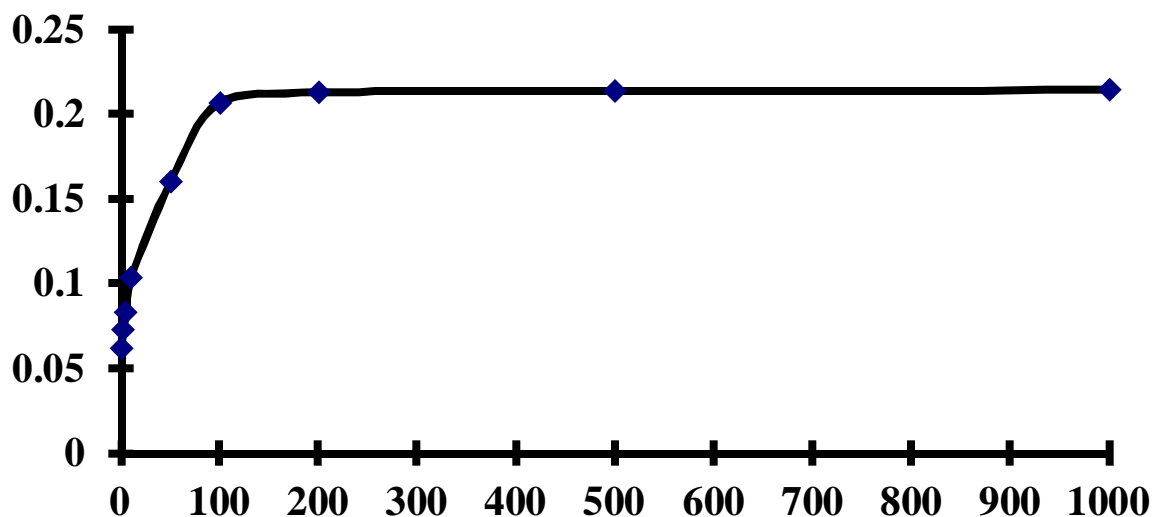

# dMet-PP2A-original data for figure 2D

|        | VR       |          |          |          | CB         |             |          |          | CC             |             |             |          | H           |             |          |          |          |
|--------|----------|----------|----------|----------|------------|-------------|----------|----------|----------------|-------------|-------------|----------|-------------|-------------|----------|----------|----------|
|        | I2CTF    |          | GFP      |          | I2CTF      |             | GFP      |          | I2CTF          |             | GFP         |          | I2CTF       |             | GFP      |          |          |
|        | MMT      | H2O      | MMT      | H2O      | MMT        | H2O         | MMT      | H2O      | MMT            | H2O         | MMT         | H2O      | MMT         | H2O         | MMT      | H2O      |          |
| 1      | 58207.48 | 116954.1 | 71589.43 | 68330.16 | 24398.93   | 67543.32    | 43179.26 | 41541.43 | 0              | 50056.56    | 62524.97    | 43765.18 | 36059.13    | 94462.58    | 164474.5 | 77548.17 | 58020.49 |
| 2      | 57724.32 | 135617.2 | 65181.77 | 61177.35 | 24320.49   | 63527.77    | 51957.87 | 44033.15 |                | 17231.31    | 85254.59    | 28911.74 | 34094.25    | 85575.45    | 138471.3 | 85209.38 | 42053.48 |
| 3      | 76389.37 | 144366.1 | 56243.07 | 57311.6  | 36559.6    | 64687.22    | 35556.35 | 39942.99 |                | 21868.31    | 90876.42    | 23555.06 | 57161.95    | 107846.2    | 146369.8 | 81524.93 | 86863.33 |
| tPP2A  | 477612.2 | 476975.5 | 457819.8 | 527122.2 | # 446025.3 | 373770.0167 | 489192.3 | 402011.2 | ## 522397.2833 | 490705.41   | 503878.2    | 562544.3 | ## 524452.9 | 435697.1    | 463189   | 480745.4 |          |
| /tPP2A | 0.121872 | 0.2452   | 0.156371 | 0.129629 | # 0.054703 | 0.180708243 | 0.088266 | 0.103334 | 0              | 0.095820918 | 0.127418653 | 0.086857 | 0.0641      | ## 0.180117 | 0.377497 | 0.160492 | 0.120689 |
|        | 0.12086  | 0.284328 | 0.142375 | 0.116059 | # 0.054527 | 0.169964871 | 0.106212 | 0.109532 | ## 0.032985086 | 0.173738988 | 0.057378    | 0.060607 | ## 0.163171 | 0.317816    | 0.183962 | 0.087476 |          |
|        | 0.15994  | 0.30267  | 0.12285  | 0.108725 | # 0.081968 | 0.173066913 | 0.072684 | 0.099358 | ## 0.041861477 | 0.185195627 | 0.046748    | 0.101613 | ## 0.205636 | 0.335944    | 0.176008 | 0.180685 |          |
| x      | 0.134224 | 0.277399 | 0.140532 | 0.118138 | # 0.063733 | 0.174580009 | 0.089054 | 0.104075 | 0              | 0.05688916  | 0.162117756 | 0.063661 | 0.07544     | ## 0.182975 | 0.343752 | 0.173488 | 0.129616 |
| sd     | 0.022277 | 0.029355 | 0.016836 | 0.010606 | # 0.015792 | 0.005529205 | 0.016778 | 0.005127 | 0              | 0.034006748 | 0.030591411 | 0.02078  | 0.022734    | ## 0.021376 | 0.030597 | 0.011936 | 0.047242 |
| P vs G | 0.321909 | 0.000905 | 0.123055 |          | 0.013604   | 8.50576E-05 | 0.21223  |          | 0.476079115    | 0.016974089 | 0.543918    |          | 0.149277    | 0.002747    | 0.193895 |          |          |
|        | 0.00254  |          |          |          | 0.000329   |             |          |          | 0.016338505    |             |             |          | 0.001725    |             |          |          |          |
| x      | 0.134224 | 0.277399 | 0.140532 | 0.118138 | # 0.063733 | 0.174580009 | 0.089054 | 0.104075 | 0              | 0.05688916  | 0.162117756 | 0.063661 | 0.07544     | ## 0.182975 | 0.343752 | 0.173488 | 0.129616 |
| sd     | 0.022277 | 0.029355 | 0.016836 | 0.010606 | # 0.015792 | 0.005529205 | 0.016778 | 0.005127 | 0              | 0.034006748 | 0.030591411 | 0.02078  | 0.022734    | ## 0.021376 | 0.030597 | 0.011936 | 0.047242 |

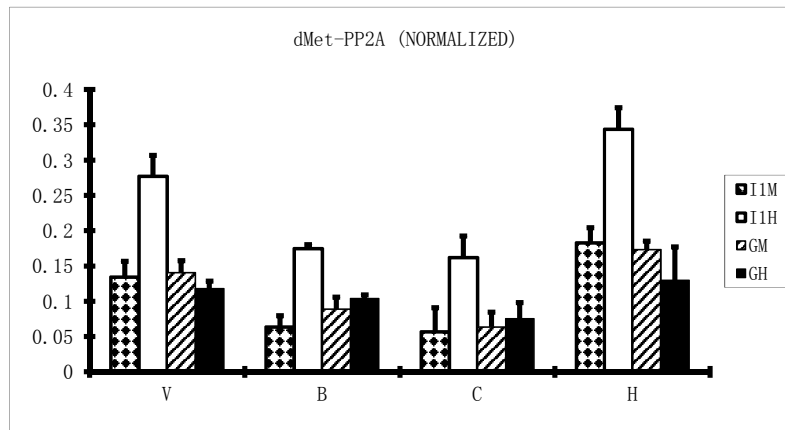

relative PP2A activity (ELISA) normalized by tPP2a-original data for figure 2C

|        | VR       |          |          |          | CB      |          |          |          | CC       |       |             |             | H        |          |       |          |          |          |          |
|--------|----------|----------|----------|----------|---------|----------|----------|----------|----------|-------|-------------|-------------|----------|----------|-------|----------|----------|----------|----------|
|        | I1       | GFP      |          |          | I1      | GFP      |          |          | I1       | GFP   |             |             | I1       | GFP      |       |          |          |          |          |
|        | MMT      | H2O      | MMT      | H2O      | MMT     | H2O      | MMT      | H2O      | MMT      | H2O   | MMT         | H2O         | MMT      | H2O      | MMT   | H2O      |          |          |          |
| 1      | 0.522    | 0.279    | 0.393    | 0.582    | 0.515   | 0.318    | 0.394    | 0.418    | 0.633    | 0.229 | 0.411       | 0.469       | 0.493    | 0.361    | 0.57  | 0.555    |          |          |          |
| 2      | 0.513    | 0.355    | 0.535    | 0.498    | 0.46    | 0.366    | 0.455    | 0.477    | 0.48     | 0.237 | 0.512       | 0.52        | 0.627    | 0.356    | 0.62  | 0.571    |          |          |          |
| 3      | 0.504    | 0.348    | 0.573    | 0.42     | 0.509   | 0.287    | 0.426    | 0.621    | 0.421    | 0.355 | 0.41        | 0.585       | 0.366    | 0.286    | 0.444 | 0.543    |          |          |          |
| pp2a   | 477612.2 | 476975.5 | 457819.8 | 527122.2 | #DIV/0! | 446025.3 | 373770   | 439192.3 | 402011.2 | 5E+05 | 522397.2833 | 490705.41   | 503878.2 | 562544.3 | ##    | 524452.9 | 435697.1 | 463189   | 480745.4 |
|        | 0.477612 | 0.476975 | 0.45782  | 0.527122 | #DIV/0! | 0.446025 | 0.37377  | 0.439192 | 0.402011 | 0.478 | 0.522397283 | 0.49070541  | 0.503878 | 0.562544 | ##    | 0.524453 | 0.435697 | 0.463189 | 0.480745 |
| /PP2A  | 1.092937 | 0.584936 | 0.858416 | 1.104109 | #DIV/0! | 1.154644 | 0.850791 | 0.897102 | 1.039773 | 0.411 | 1.211722119 | 0.466680253 | 0.815674 | 0.833778 | ##    | 0.940122 | 0.828552 | 1.230599 | 1.154566 |
|        | 1.074094 | 0.744274 | 1.168582 | 0.944753 | #DIV/0! | 1.031332 | 0.979212 | 1.035993 | 1.186535 | 0     | 0.918841418 | 0.482983493 | 1.016119 | 0.924444 | ##    | 1.195652 | 0.817076 | 1.338546 | 1.187851 |
|        | 1.05525  | 0.729598 | 1.251584 | 0.828203 | #DIV/0! | 1.141192 | 0.78896  | 0.969963 | 1.544734 | 0     | 0.805900493 | 0.723456287 | 0.813689 | 1.04     | ##    | 0.697941 | 0.656415 | 0.958572 | 1.129603 |
| x      | 1.074094 | 0.686269 | 1.09286  | 0.959022 | #DIV/0! | 1.109056 | 0.872987 | 0.967686 | 1.257014 | 1.074 | 0.978821343 | 0.557706678 | 0.881827 | 0.932741 | ##    | 0.944572 | 0.767348 | 1.175906 | 1.15734  |
| sd     | 0.018844 | 0.088063 | 0.207233 | 0.138505 | #DIV/0! | 0.067646 | 0.097049 | 0.069474 | 0.259754 | 0.019 | 0.209454032 | 0.143774645 | 0.116304 | 0.103361 | ##    | 0.248886 | 0.096242 | 0.195803 | 0.029223 |
| P vs G | 0.227047 | 0.045089 | 0.405003 |          |         | 0.393772 | 0.074457 | 0.135811 |          |       | 0.74976343  | 0.021420716 | 0.601171 |          |       | 0.215354 | 0.002559 | 0.87884  |          |
|        | 0.001726 |          |          |          |         | 0.025903 |          |          |          |       | 0.045420968 |             |          |          |       | 0.3141   |          |          |          |
| x      | 1.074094 | 0.686269 | 1.09286  | 0.948547 | #DIV/0! | 1.109056 | 0.865951 | 0.967686 | 1.248722 | 1.074 | 0.978821343 | 0.557706678 | 0.881827 | 0.932741 | ##    | 0.944572 | 0.767348 | 1.175906 | 1.15734  |
| sd     | 0.018844 | 0.088063 | 0.207233 | 0.1537   | #DIV/0! | 0.067646 | 0.106492 | 0.069474 | 0.270337 | 0.019 | 0.209454032 | 0.143774645 | 0.116304 | 0.103361 | ##    | 0.061886 | 0.096242 | 0.195803 | 0.029223 |

| GHH1  | GHH2  | GHH3  | GHC1  | GHC2  | GHC3  |
|-------|-------|-------|-------|-------|-------|
| GHB1  | GHB2  | GHB3  | GHV1  | GHV2  | GHV3  |
| GHHM1 | GHHM2 | GHHM3 | GHMC1 | GHMC2 | GHMC3 |
| GHMB1 | GHMB2 | GHMB3 | GHMV1 | GHMV2 | GHMV3 |
| IHH1  | IHH2  | IHH3  | IHC1  | IHC2  | IHC3  |
| IHB1  | IHB2  | IHB3  | IHV1  | IHV2  | IHV3  |
| IHHM1 | IHHM2 | IHHM3 | IHMC1 | IHMC  | IHMC3 |
| IHMB1 | IHMB2 | IHMB3 | IHMV1 | IHMV  | IHMV3 |
|       |       |       |       |       |       |
| 0.555 | 0.571 | 0.543 | 0.469 | 0.52  | 0.585 |
| 0.408 | 0.477 | 0.621 | 0.582 | 0.498 | 0.42  |
| 0.57  | 0.62  | 0.444 | 0.411 | 0.512 | 0.41  |
| 0.394 | 0.455 | 0.426 | 0.393 | 0.535 | 0.573 |
| 0.361 | 0.356 | 0.286 | 0.229 | 0.237 | 0.355 |
| 0.318 | 0.366 | 0.287 | 0.279 | 0.355 | 0.348 |
| 0.493 | 0.627 | 0.366 | 0.633 | 0.48  | 0.421 |
| 0.515 | 0.46  | 0.509 | 0.522 | 0.513 | 0.504 |

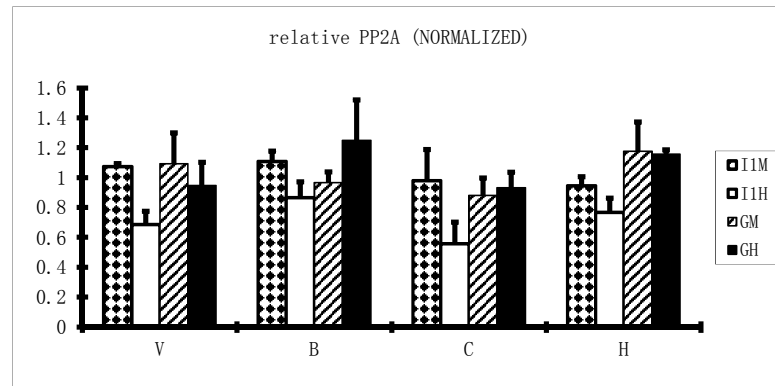

tPP2A -original data for figure 2B

|        | VR       |          |          |          | # | CB       |          |          |          | #  | CC          |             |          |          | #  | H        |          |          |          |
|--------|----------|----------|----------|----------|---|----------|----------|----------|----------|----|-------------|-------------|----------|----------|----|----------|----------|----------|----------|
|        | I2CTF    |          | GFP      |          |   | I2CTF    |          | GFP      |          |    | I2CTF       |             | GFP      |          |    | I2CTF    |          | GFP      |          |
|        | MMT      | H2O      | MMT      | H2O      |   | MMT      | H2O      | MMT      | H2O      |    | MMT         | H2O         | MMT      | H2O      |    | MMT      | H2O      | MMT      | H2O      |
| 1      | 519124.9 | 437685   | 410559.4 | 523784.7 |   | 478528.4 | 363499.7 | 465680.9 | 404945.1 | 0  | 534127.23   | 497749.4    | 534316.6 | 534631.3 |    | 582322.9 | 438851.3 | 391174.6 | 470114.9 |
| 2      | 457554.1 | 485337.4 | 465963.1 | 511556.6 |   | 432861.3 | 383165.8 | 536404.5 | 360965.9 |    | 509236.72   | 510354.03   | 510609.5 | 544078.6 |    | 502979.6 | 465495.6 | 495845.1 | 459214.8 |
| 3      | 456157.5 | 507904.2 | 496936.8 | 546025.3 |   | 426686.1 | 374644.6 | 465491.6 | 440122.4 |    | 523827.9    | 464012.8    | 466708.4 | 608923.1 |    | 488056.4 | 402744.4 | 502547.2 | 512906.5 |
| DM1A   | 205176   | 210463.3 | 200881.7 | 220532.3 | # | 212515.1 | 205184.8 | 199088.3 | 195222.5 | ## | 151329.3333 | 167888.3333 | 153233.7 | 136392.3 | ## | 205192.4 | 215862.1 | 225162.4 | 223944.8 |
| /DM1A  | #REF!    | #REF!    | #REF!    | #REF!    | # | #REF!    | #REF!    | #REF!    | #REF!    | 0  | #REF!       | #REF!       | #REF!    | #REF!    | ## | #REF!    | #REF!    | #REF!    | #REF!    |
|        | #REF!    | #REF!    | #REF!    | #REF!    | # | #REF!    | #REF!    | #REF!    | #REF!    | ## | #REF!       | #REF!       | #REF!    | #REF!    | ## | #REF!    | #REF!    | #REF!    | #REF!    |
|        | #REF!    | #REF!    | #REF!    | #REF!    | # | #REF!    | #REF!    | #REF!    | #REF!    | ## | #REF!       | #REF!       | #REF!    | #REF!    | ## | #REF!    | #REF!    | #REF!    | #REF!    |
| x      | 477612.2 | 476975.5 | 457819.8 | 527122.2 | # | 446025.3 | 373770   | 489192.3 | 402011.2 | ## | 522397.2833 | 490705.41   | 503878.2 | 562544.3 | ## | 524452.9 | 435697.1 | 463189   | 480745.4 |
| sd     | 35957.82 | 35848.63 | 43760.7  | 17475.07 | # | 28317.35 | 9862.198 | 40887.05 | 39659.72 | ## | 12506.77297 | 23960.19086 | 34303.08 | 40442.02 | ## | 50669.23 | 31494.26 | 62456.24 | 28380.55 |
| P vs G | 0.098538 | 0.094968 | 0.063481 |          |   | 0.192776 | 0.297425 | 0.056926 |          |    | 0.175797666 | 0.057158804 | #REF!    |          |    | 0.262358 | 0.139526 | 0.680495 |          |
|        | #REF!    |          |          |          |   | #REF!    |          |          |          |    | #REF!       |             |          |          |    | #REF!    |          |          |          |
| x      | 477612.2 | 476975.5 | 457819.8 | 527122.2 | # | 446025.3 | 373770   | 489192.3 | 402011.2 | ## | 522397.2833 | 490705.41   | 503878.2 | 562544.3 | ## | 524452.9 | 435697.1 | 463189   | 480745.4 |
| sd     | 35957.82 | 35848.63 | 43760.7  | 17475.07 | # | 28317.35 | 9862.198 | 40887.05 | 39659.72 | ## | 12506.77297 | 23960.19086 | 34303.08 | 40442.02 | ## | 50669.23 | 31494.26 | 62456.24 | 28380.55 |

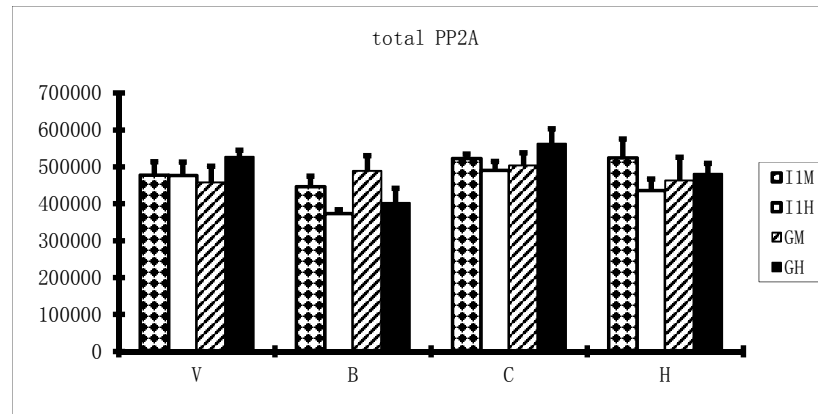

Supplement: pone.0145441.s001.pdf [file pone.0145441.s001.pdf]
